# Supplementary material
Source: Springer Nature journal article supplement (https://www.springermedizin.de/resource/supplementary/12878_2013_9_MOESM1_ESM.pdf/9686352)

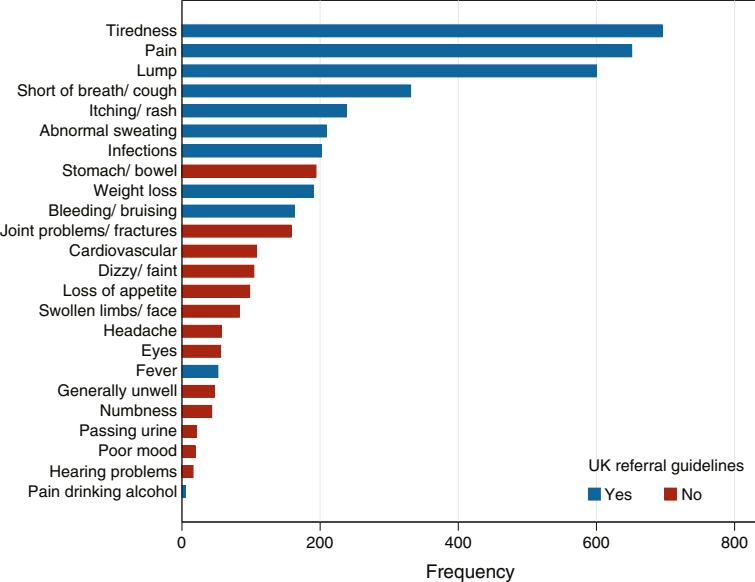

Supplement: MOESM1 [file 9686352]
